# Supplementary material
Source: Oxford University Press journal article supplement (doi:10.1093/g3journal_jkac140)

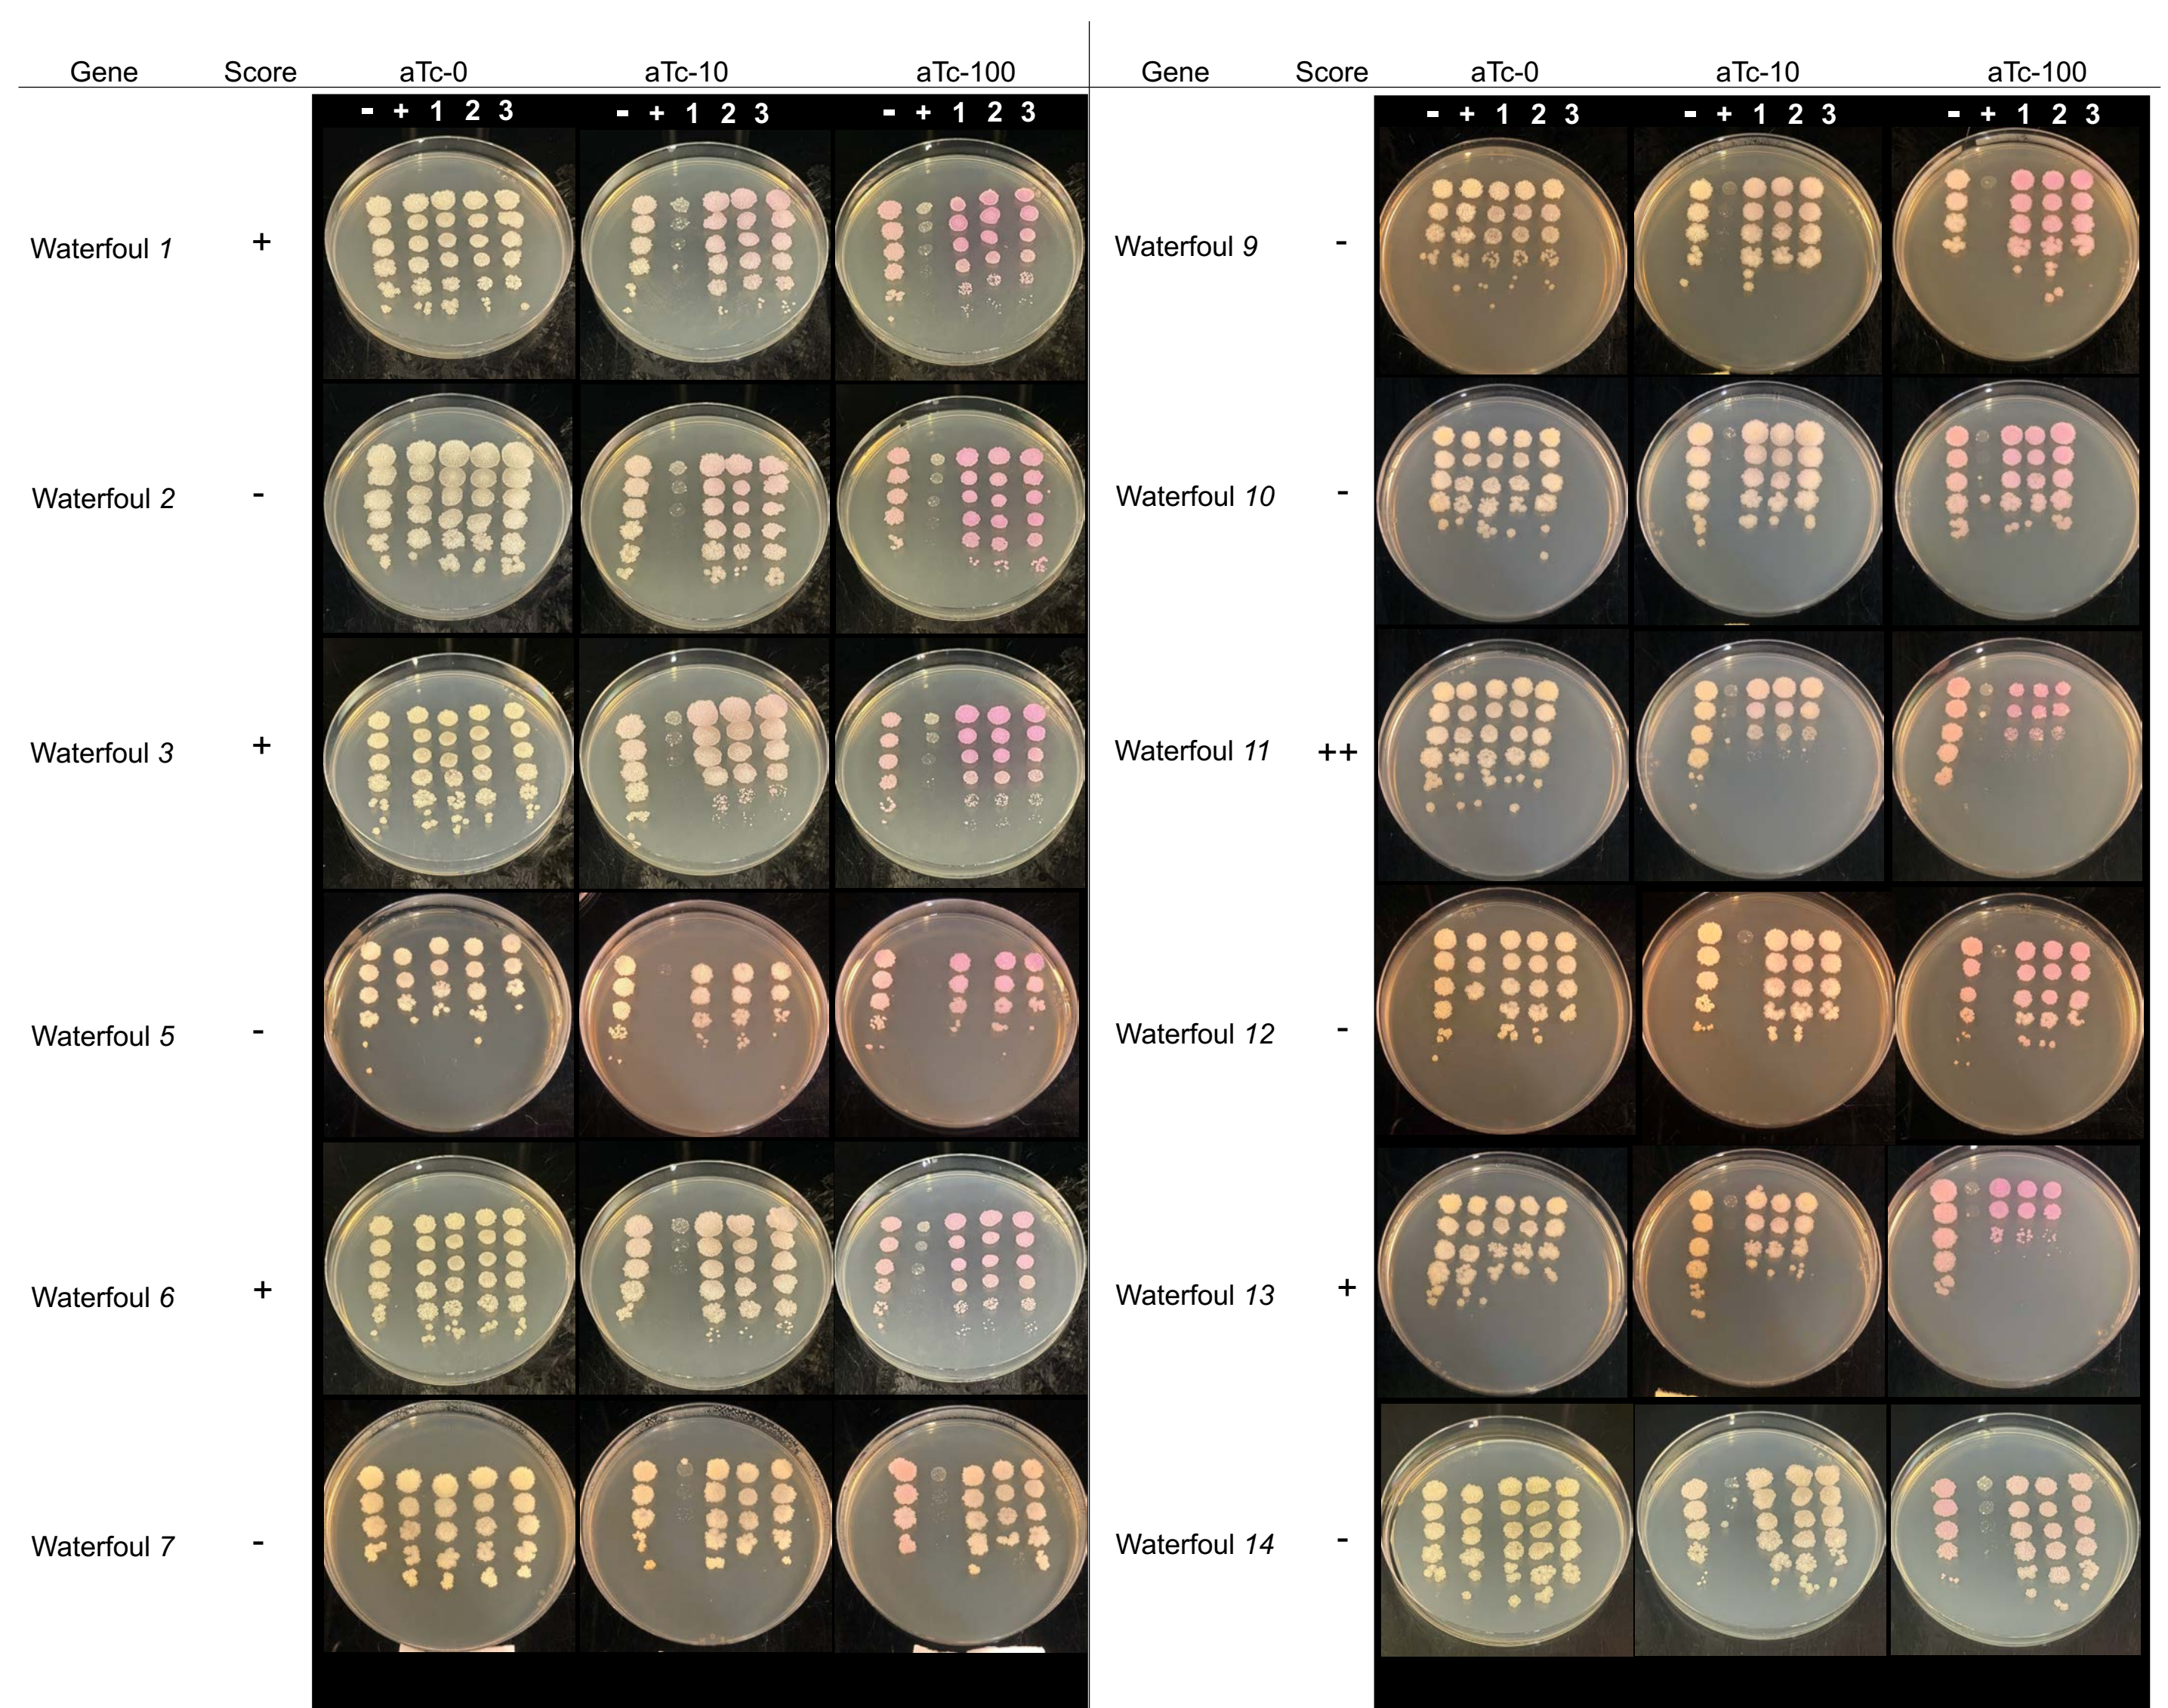



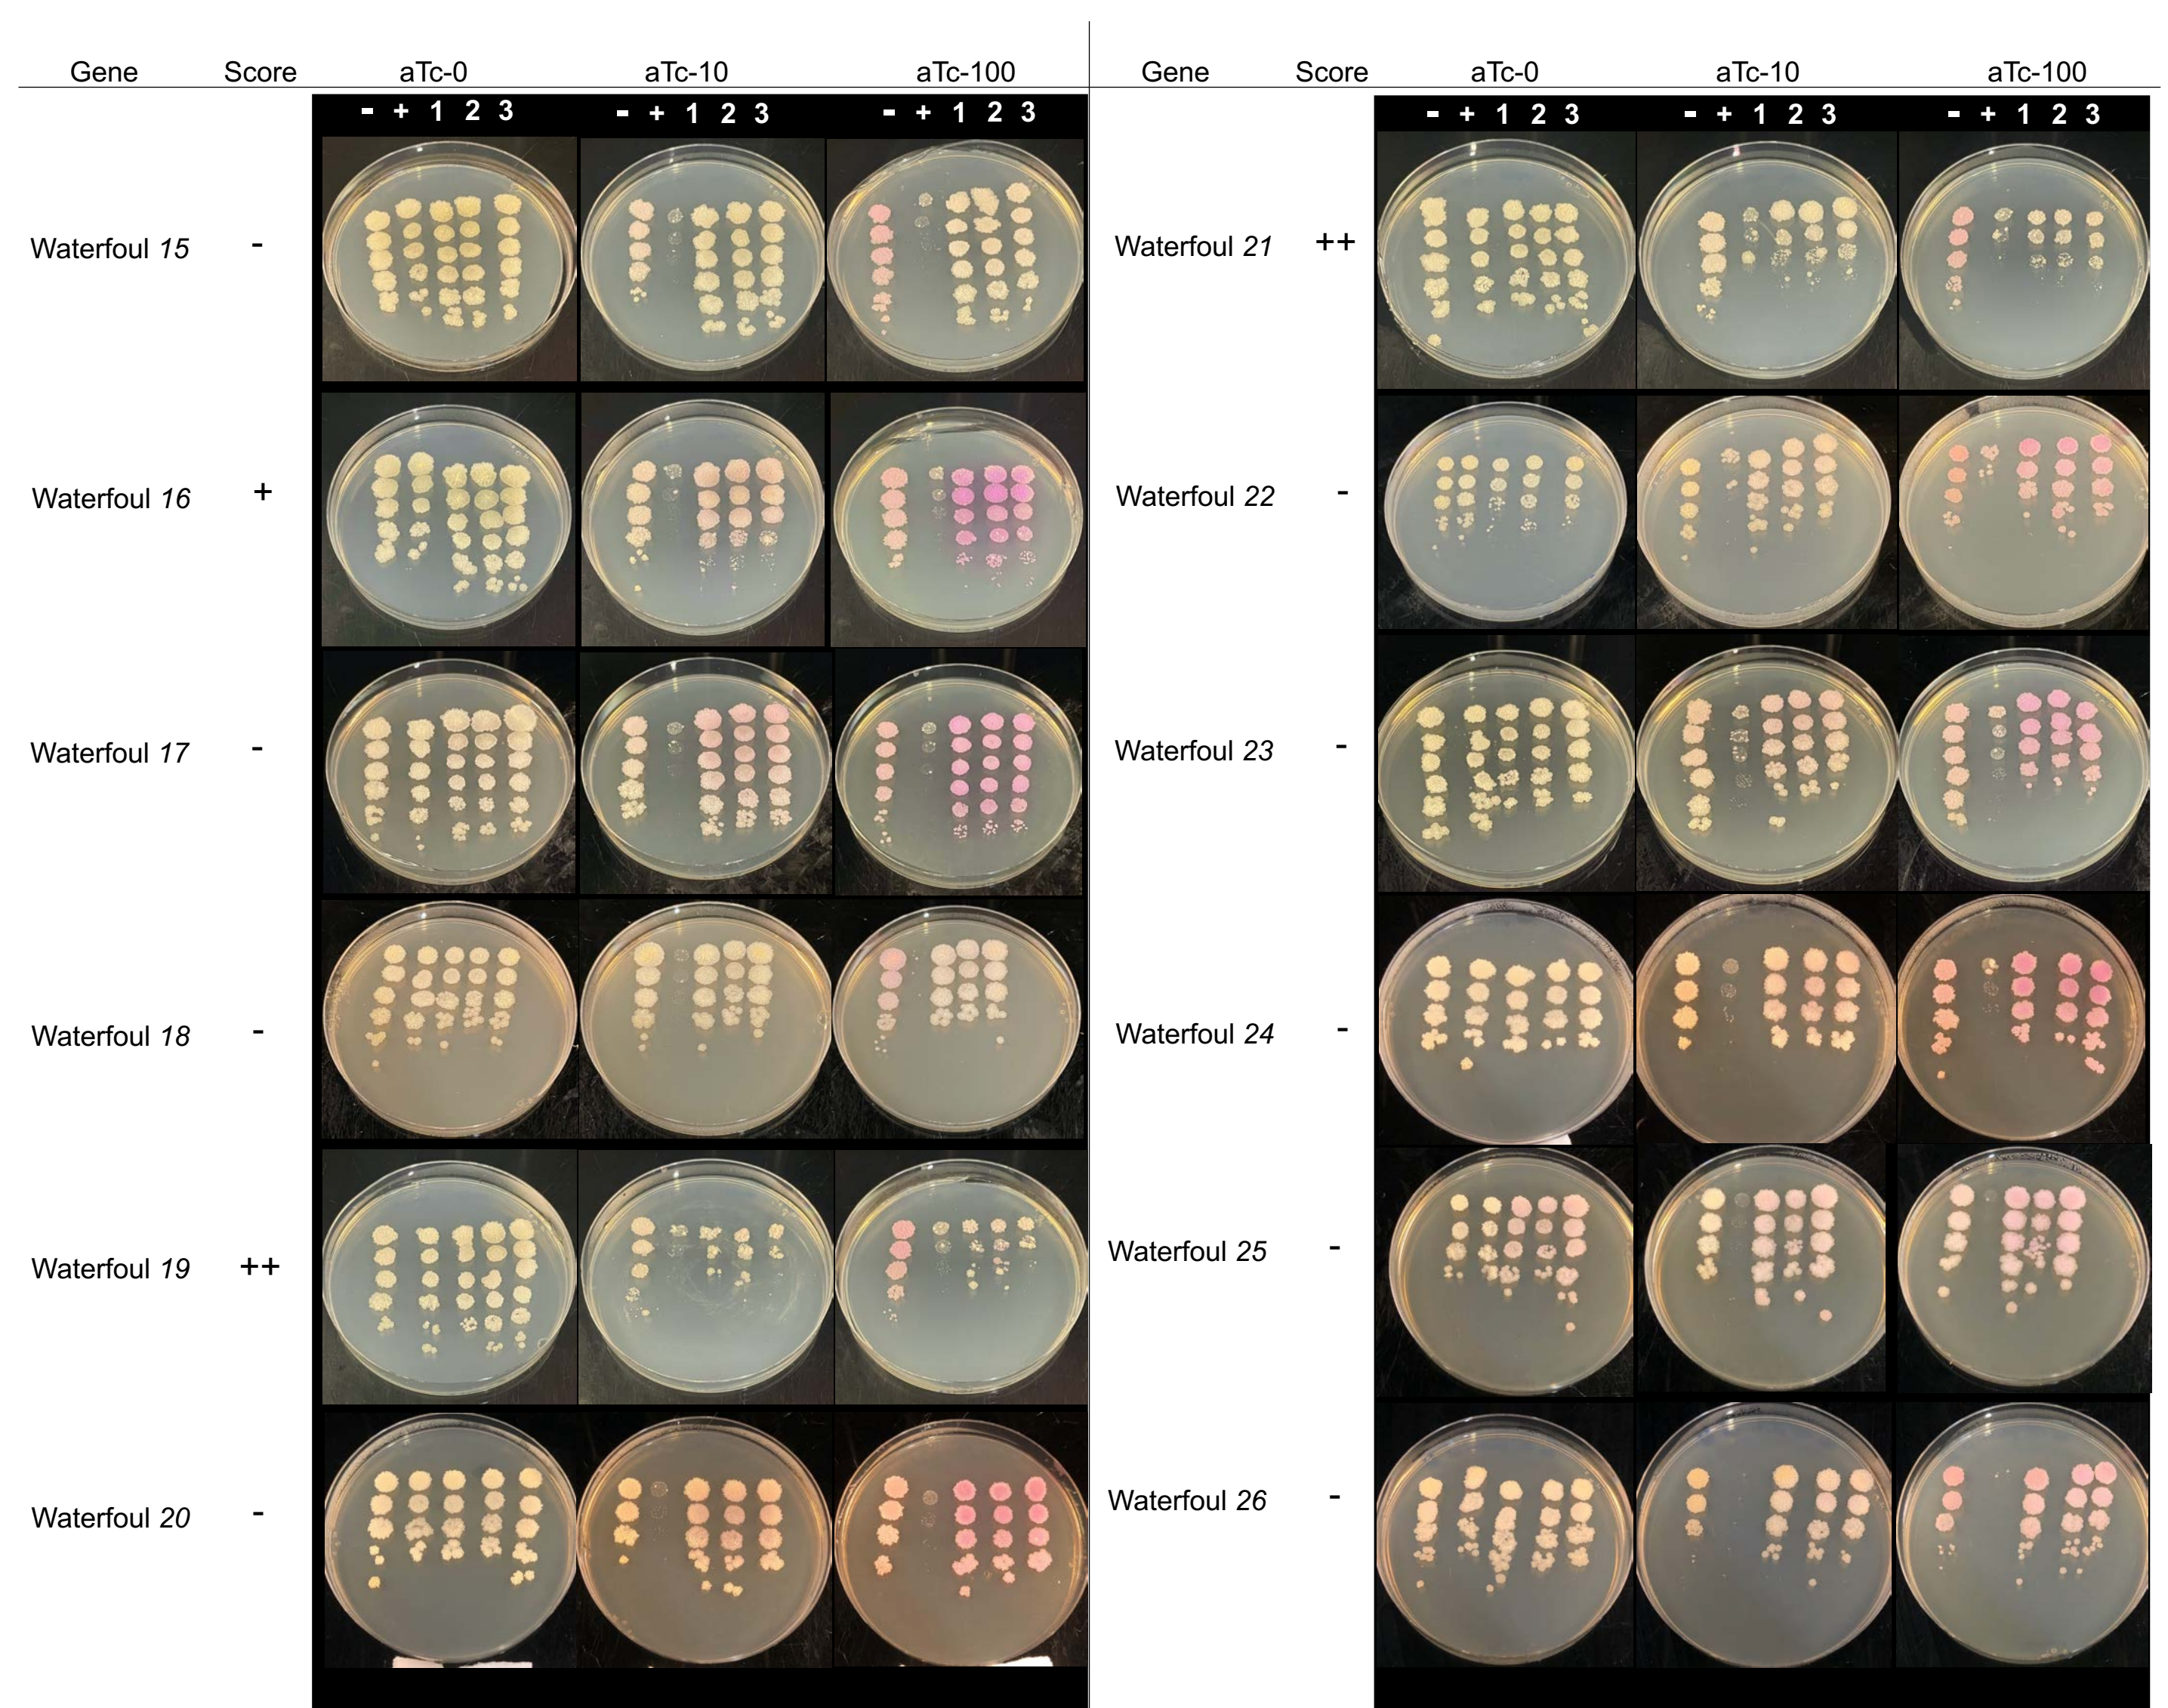



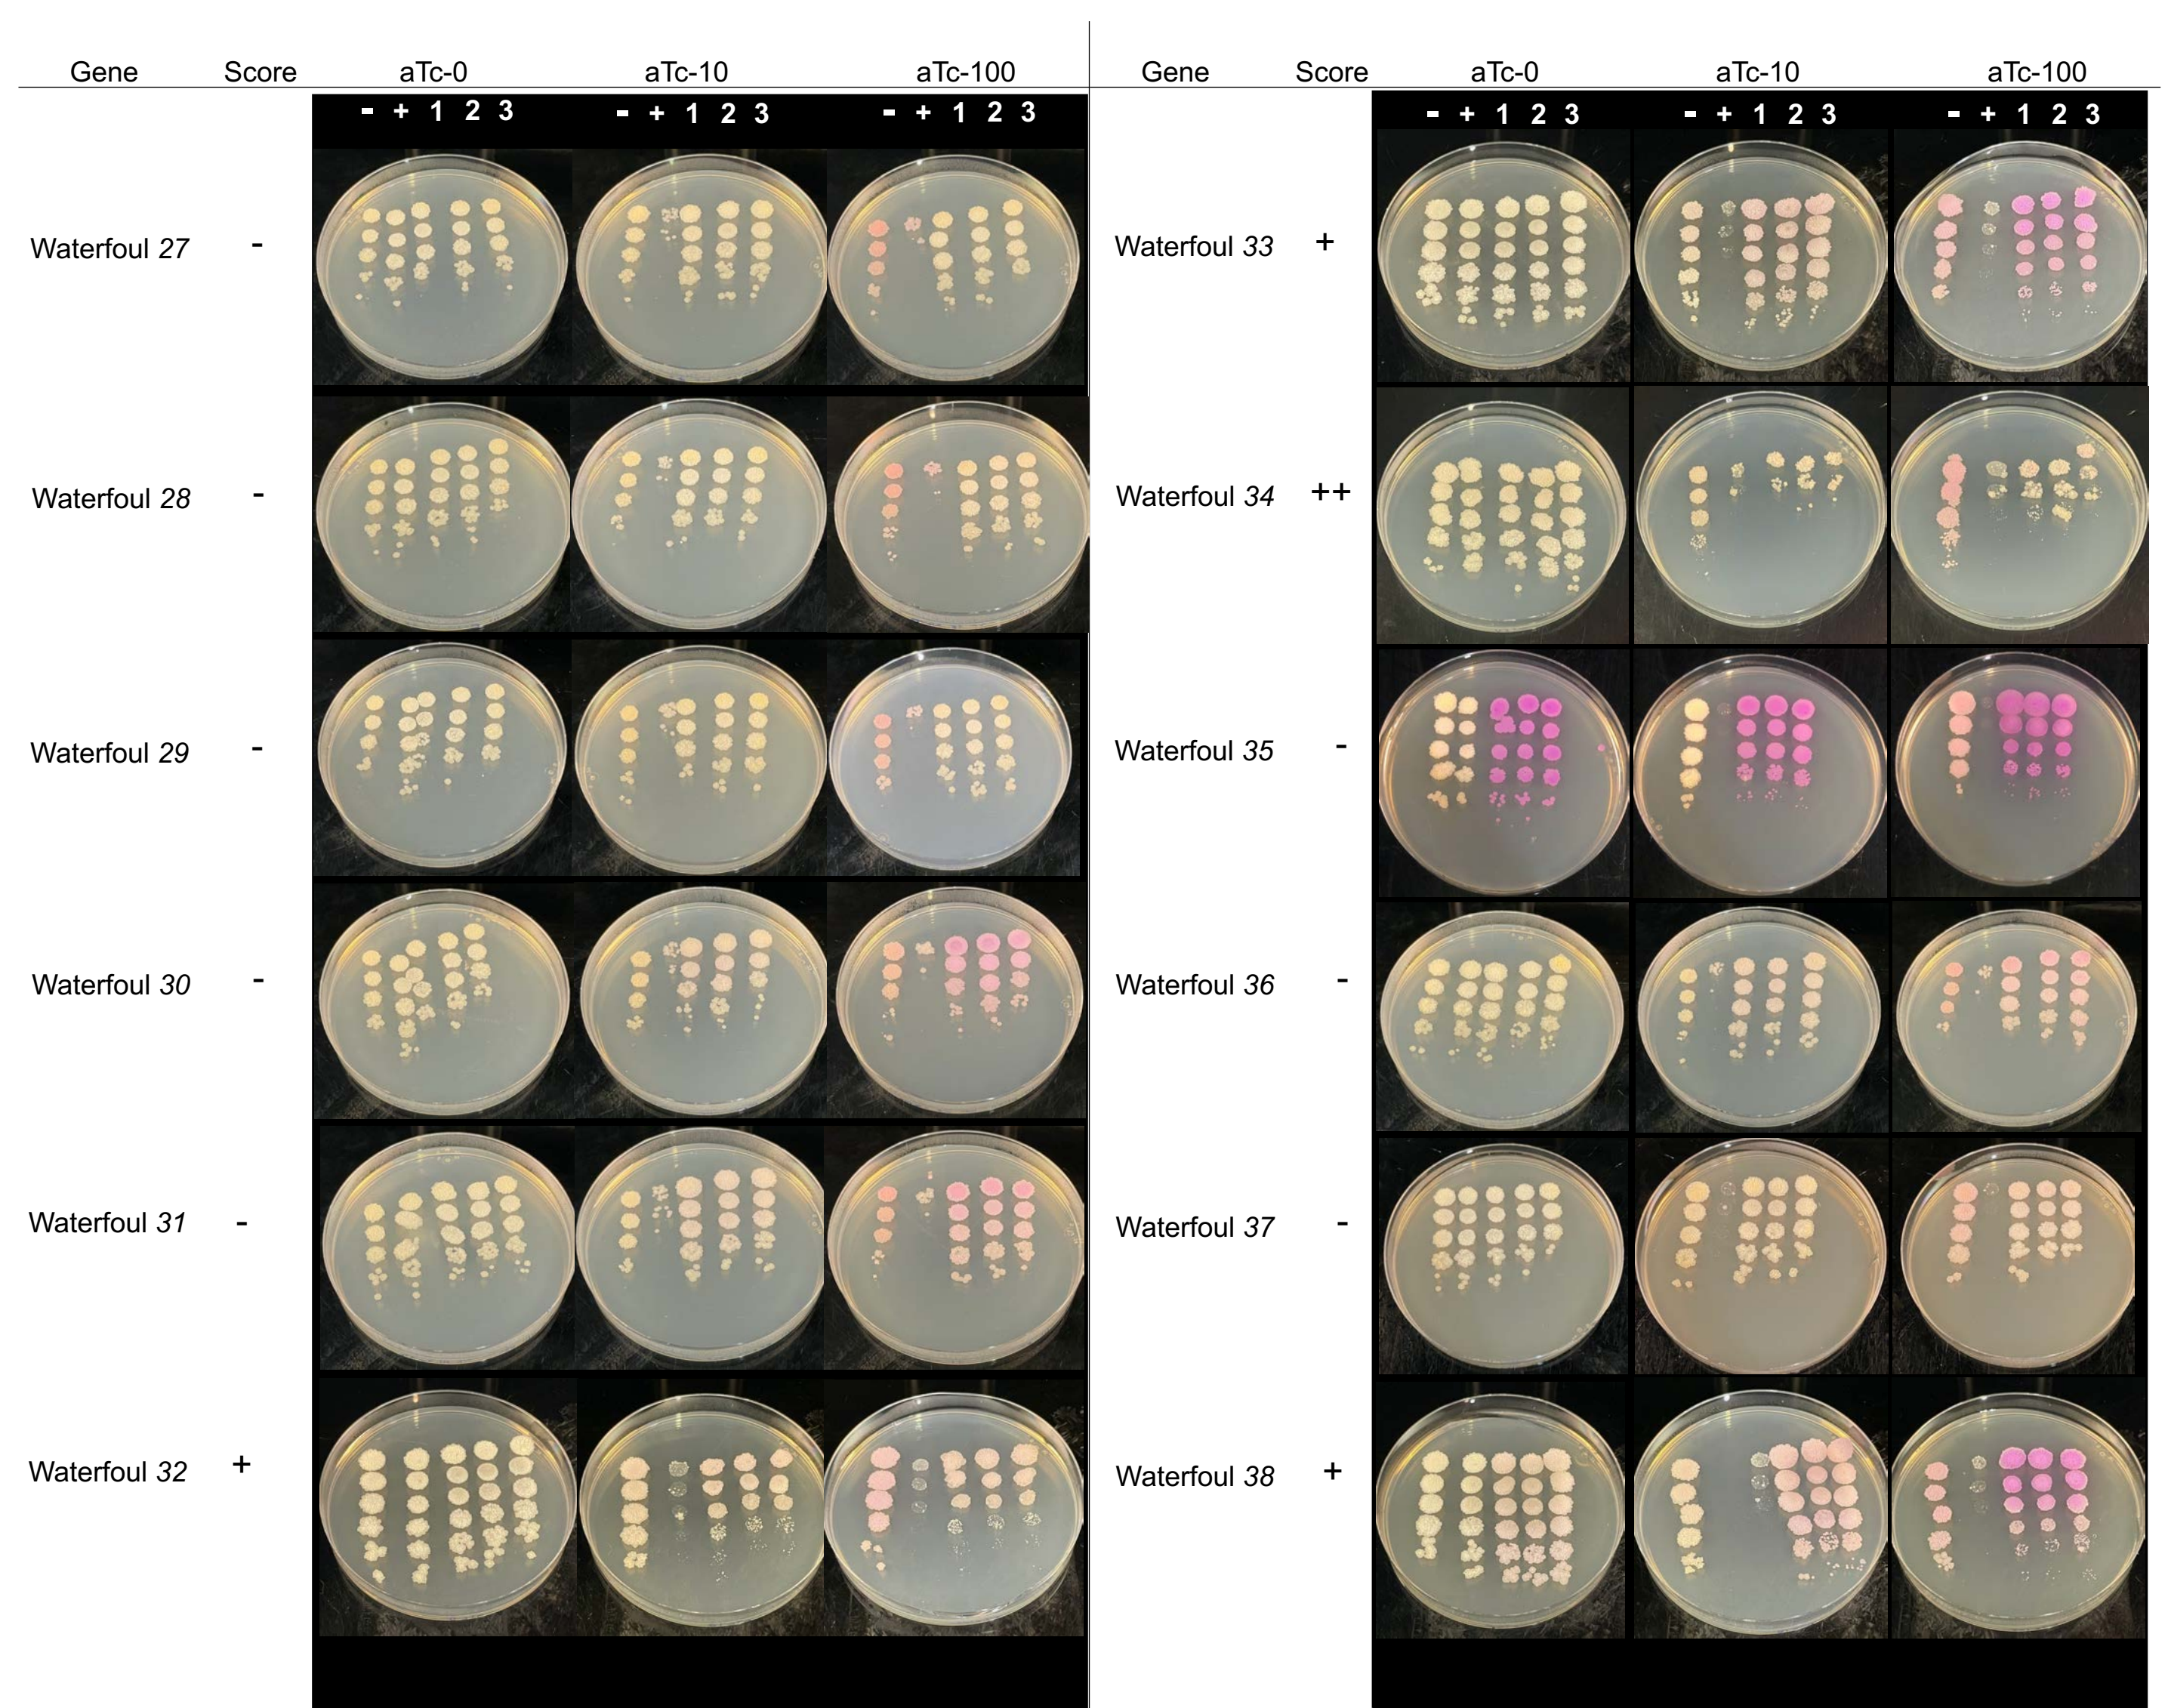



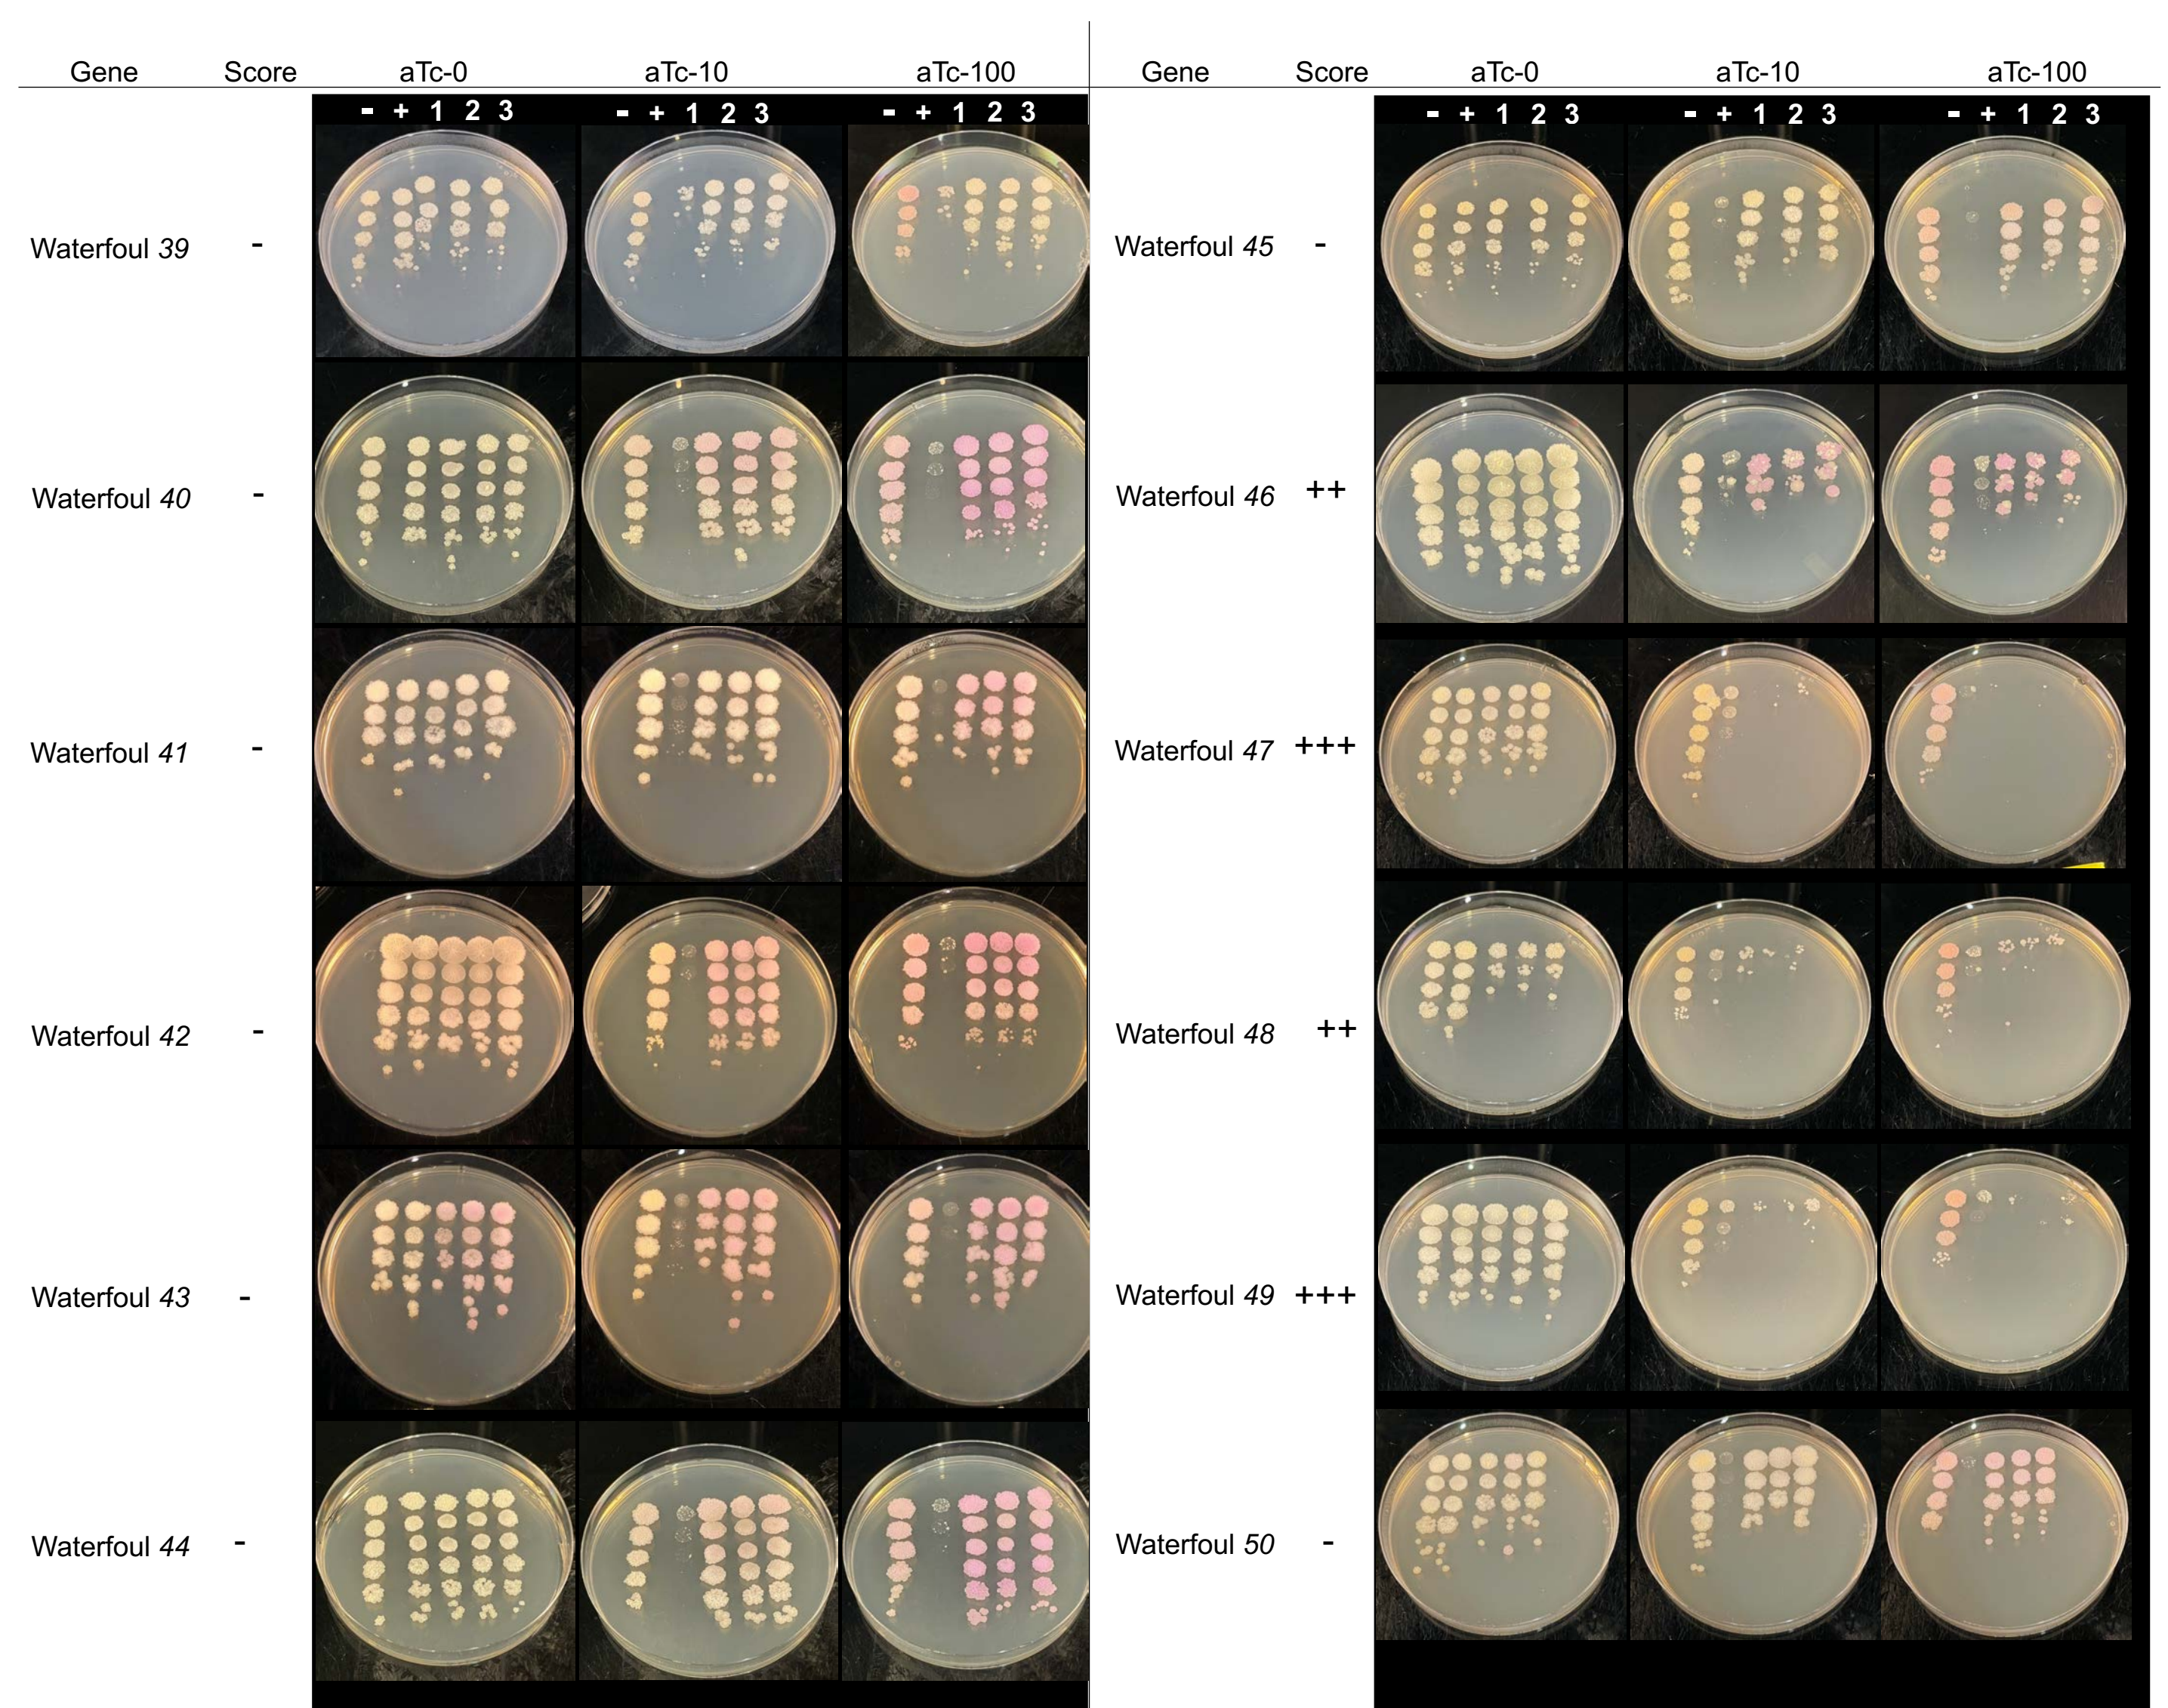



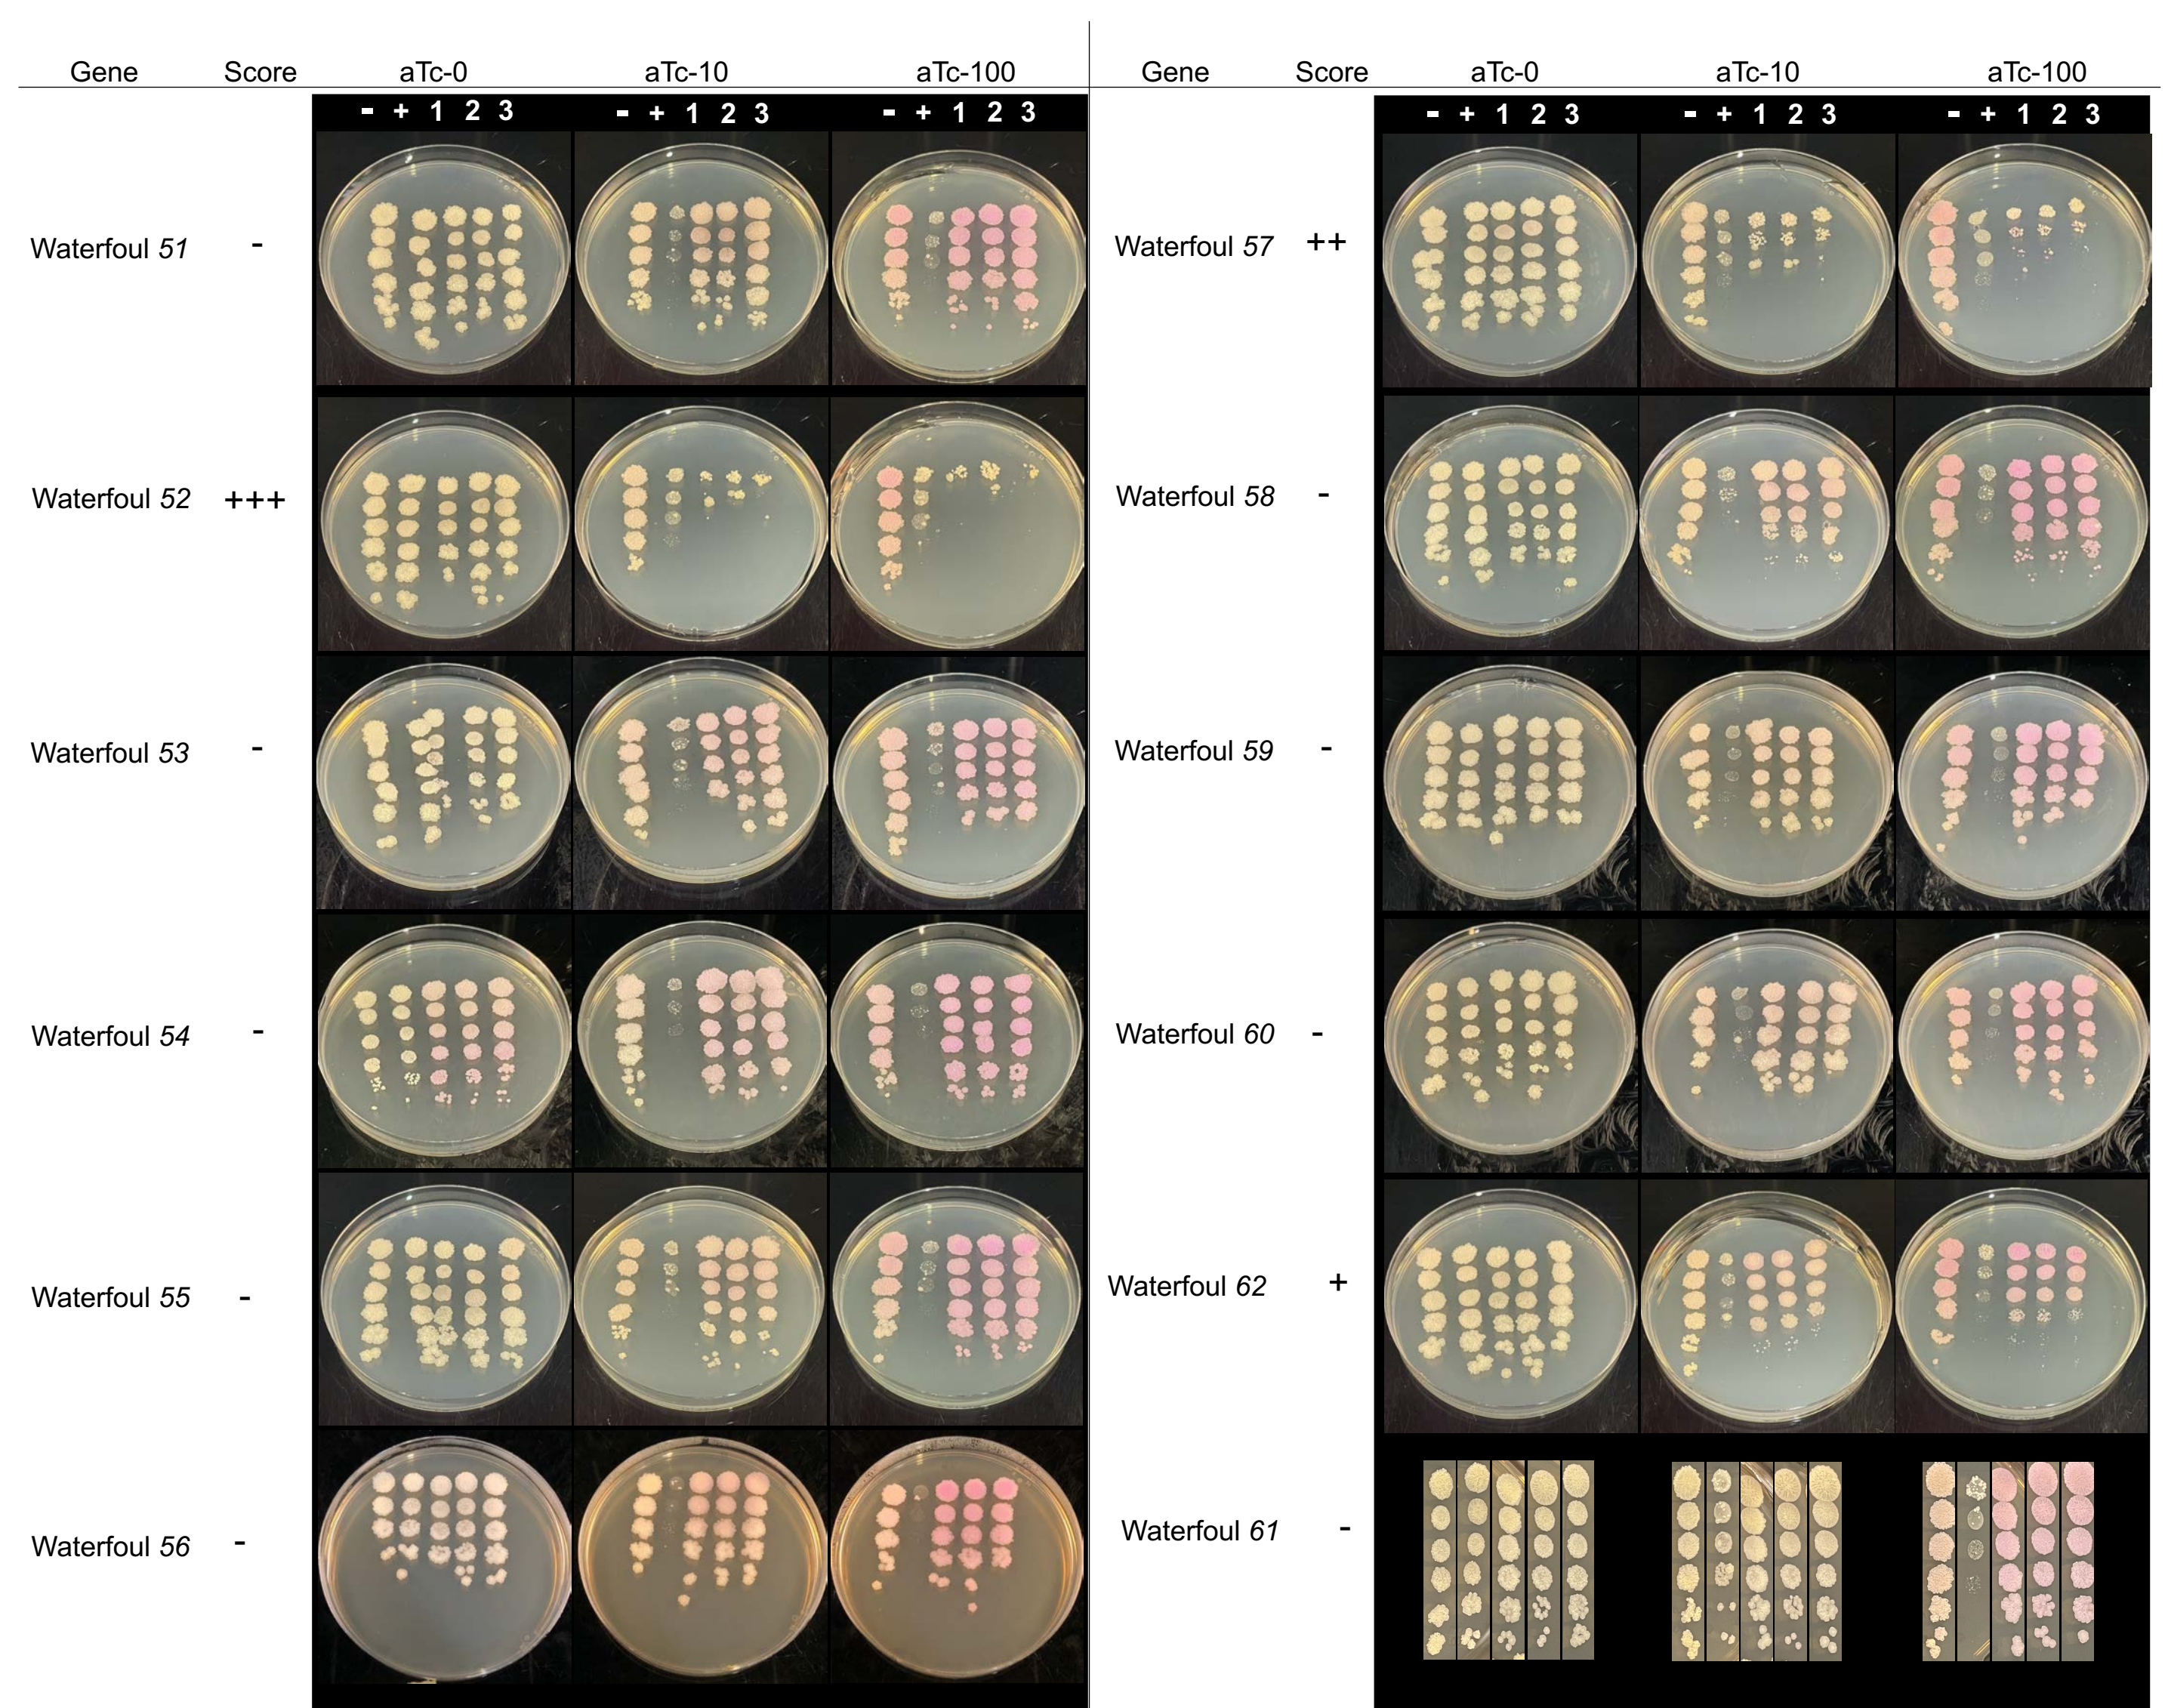



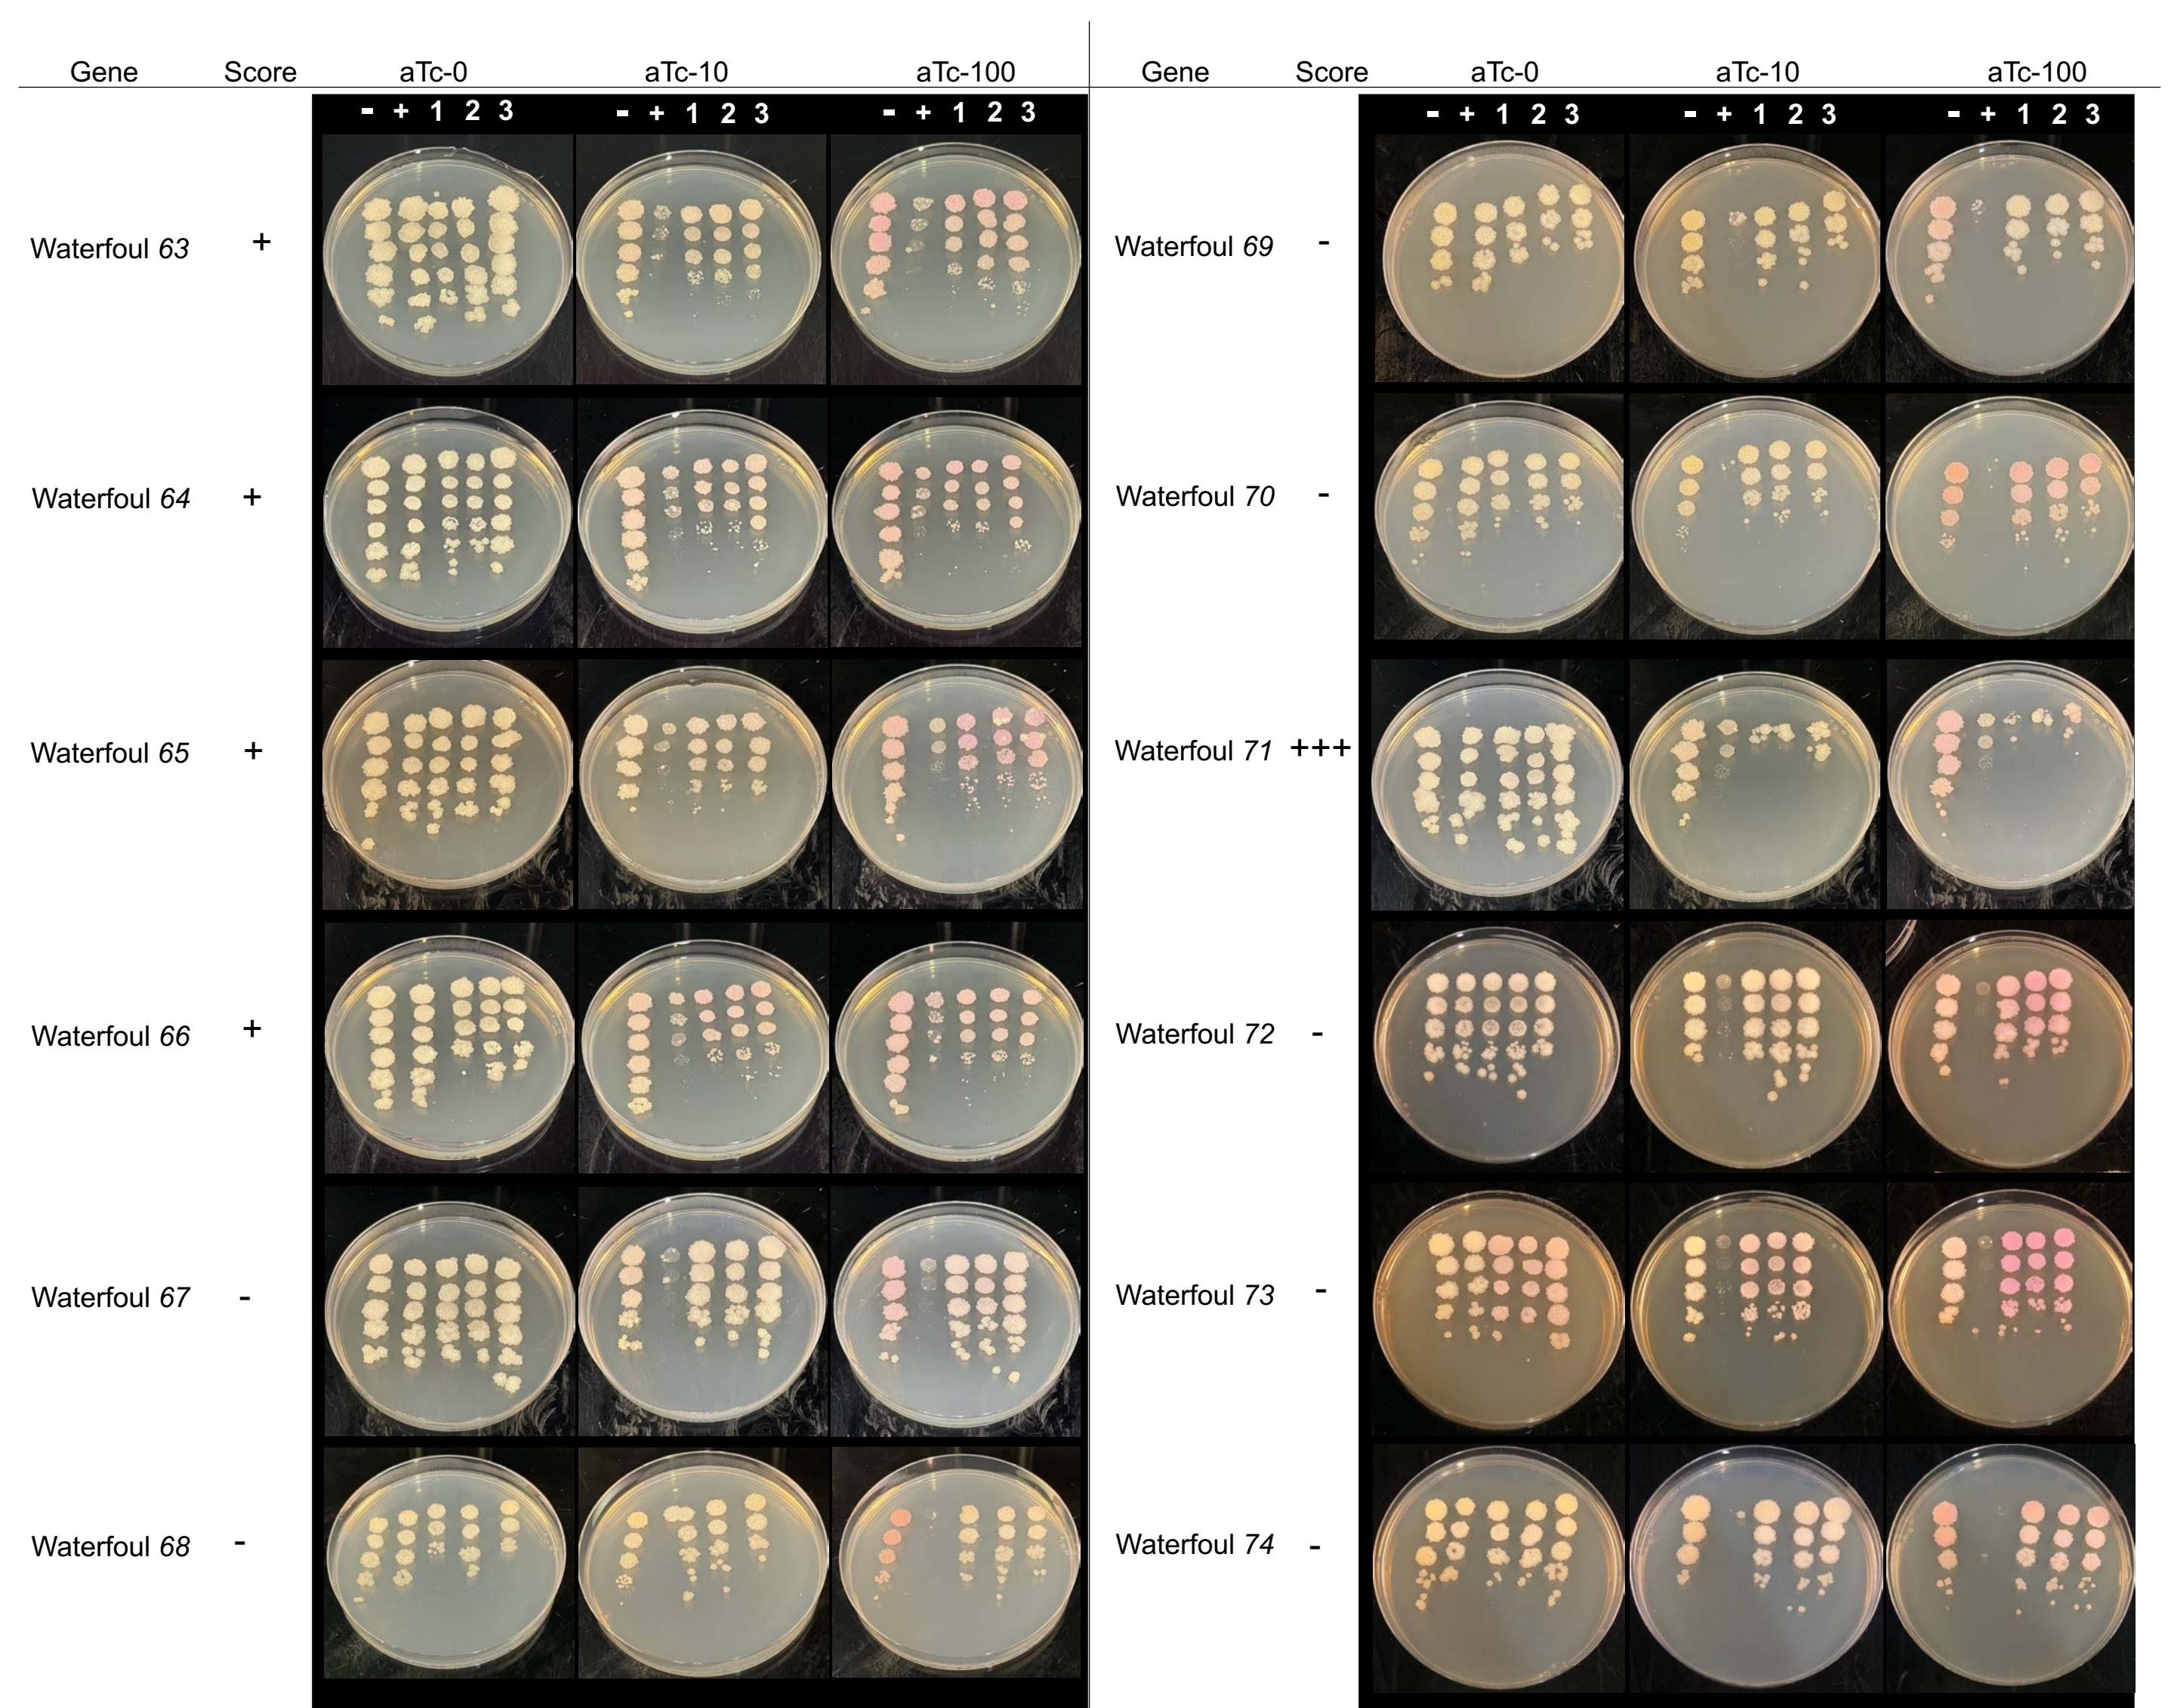



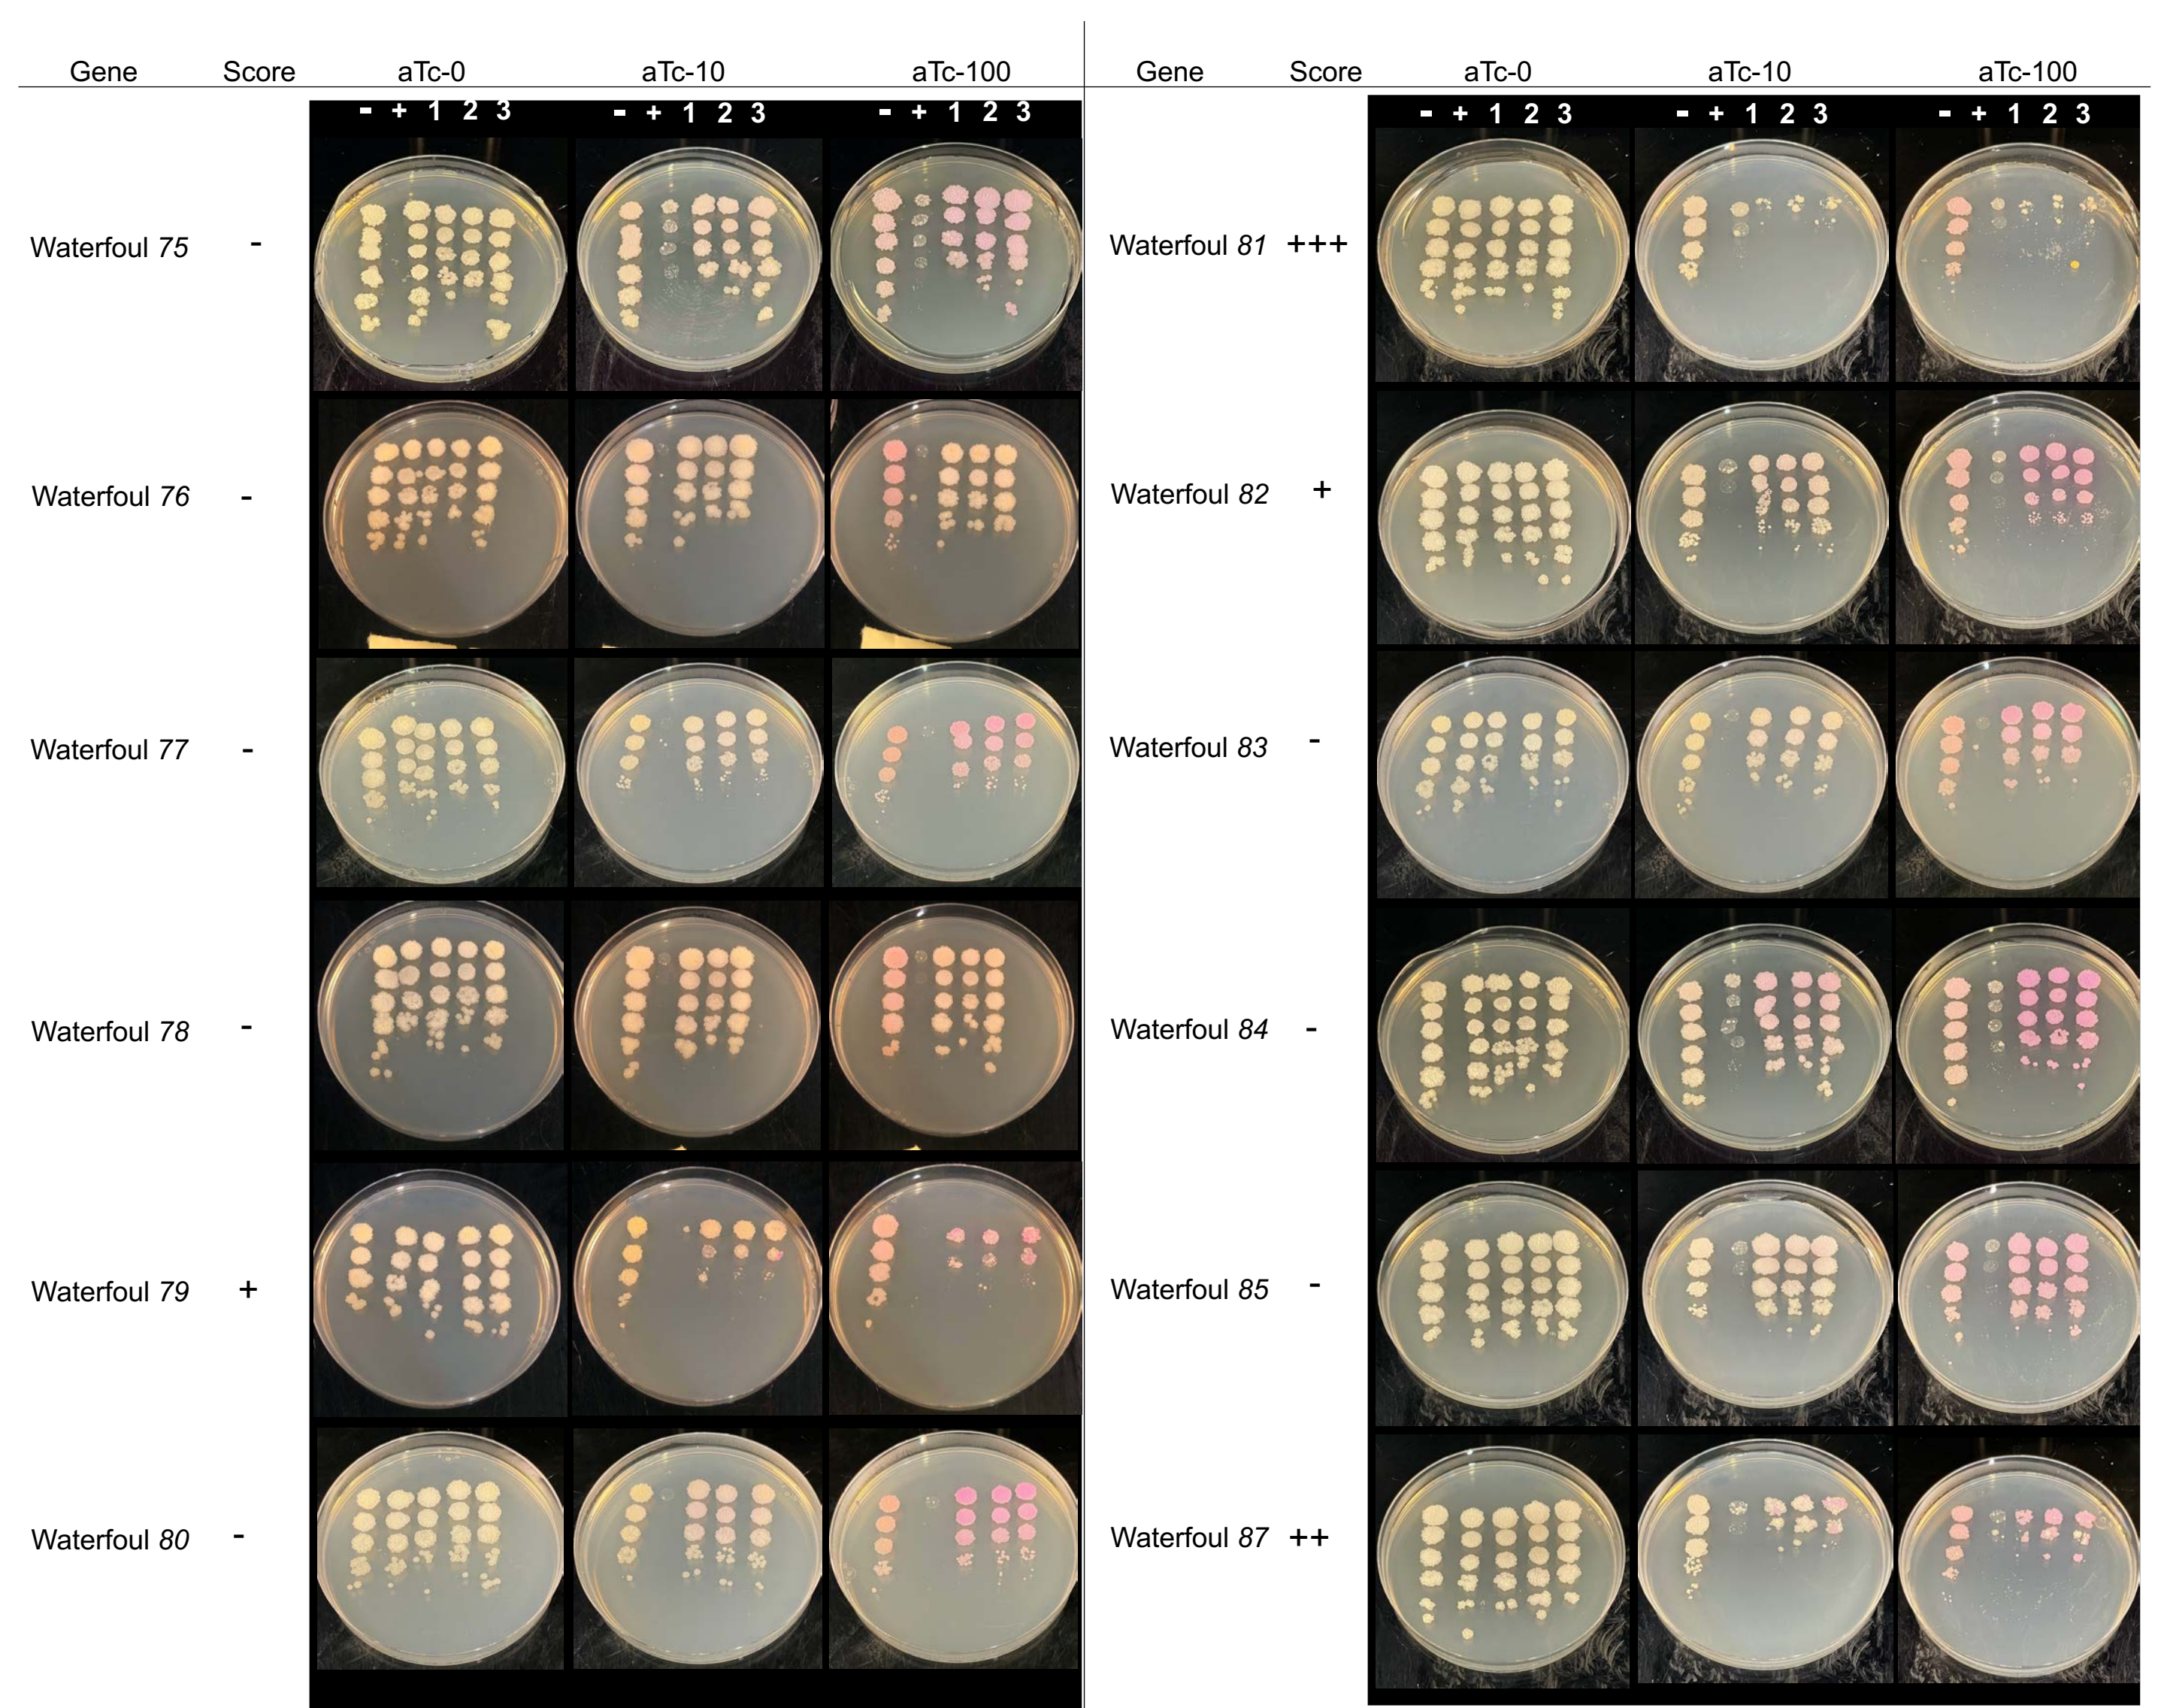



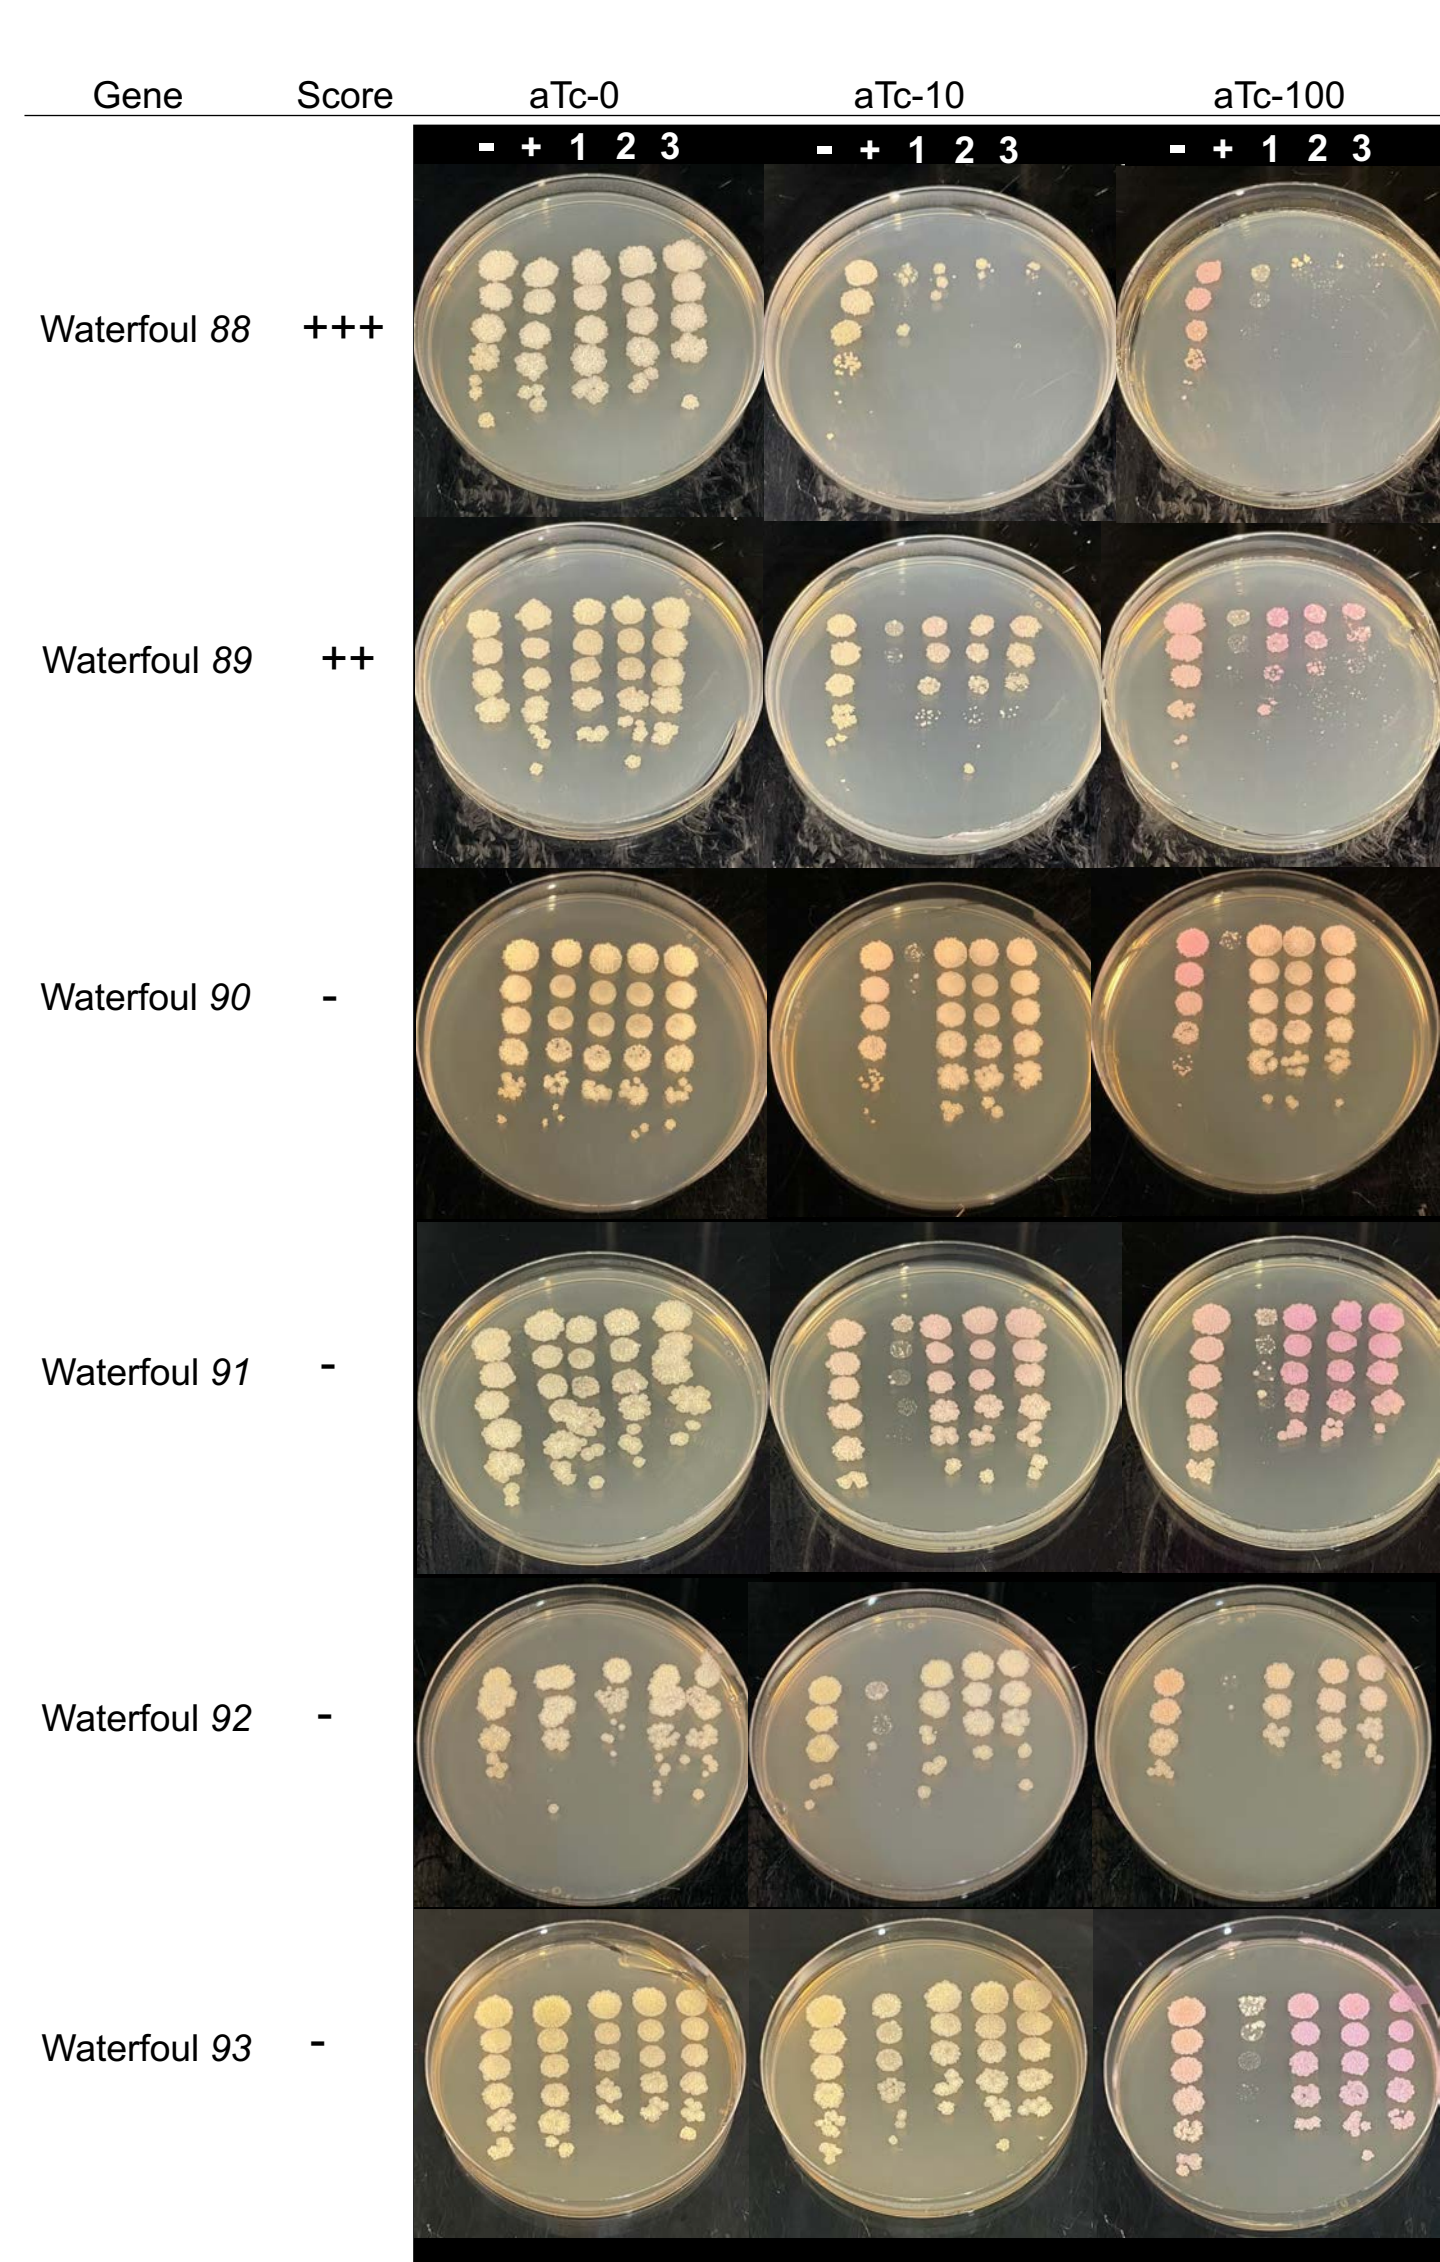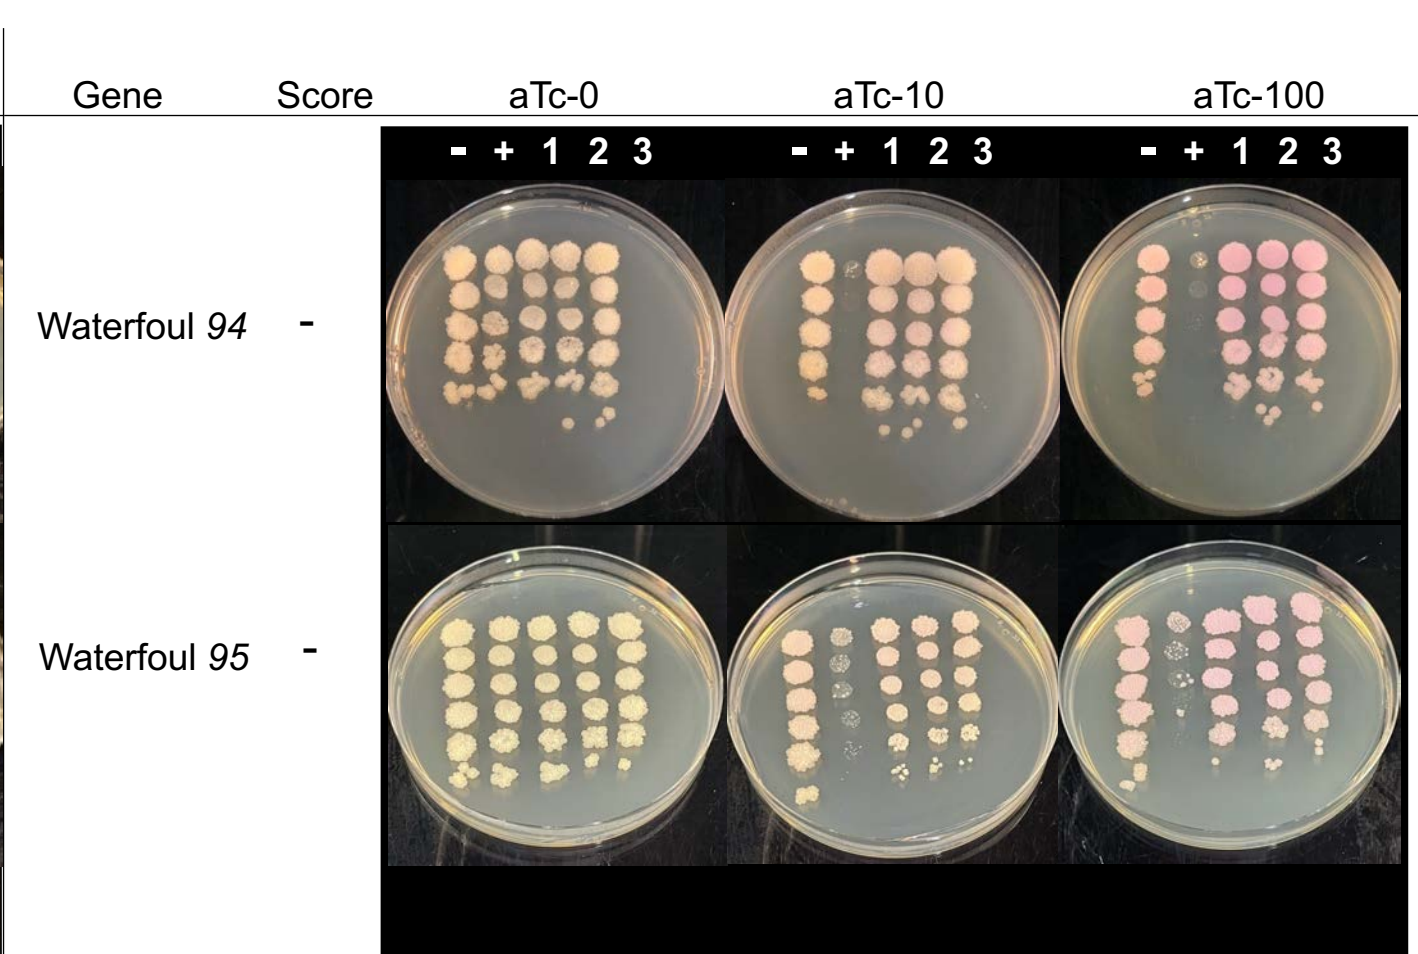

Supplement: jkac140_supplemental_figure_1.pdf [file jkac140_supplemental_figure_1.pdf]
